# Supplementary material for: Identifying priorities in knowledge translation from the perspective of trainees: results from an online survey
Source: PubMed Central journal article supplement (PMC4475286; doi:10.1186/s13012-015-0282-5), 2015-06-21

Identified  
KT  
Priorities

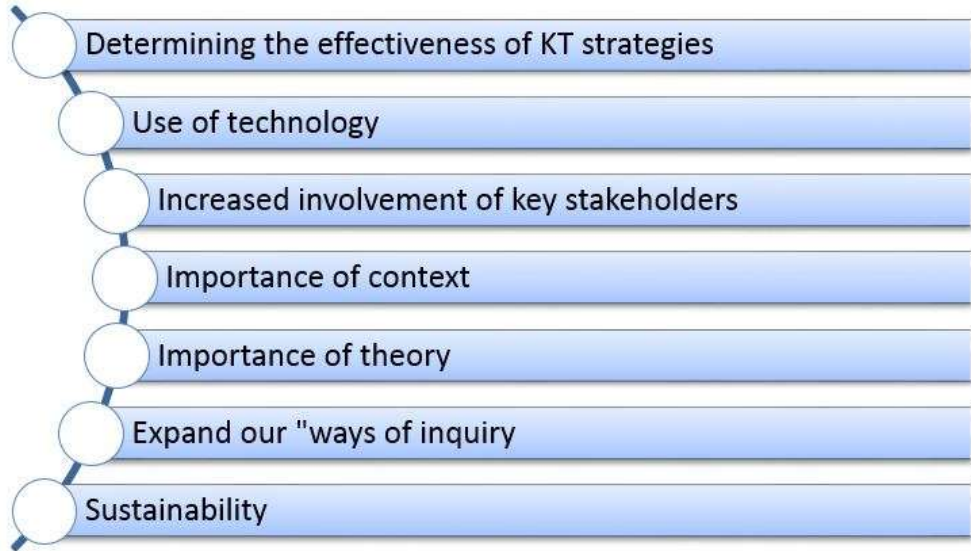

Supplement: 13012_2015_282_MOESM1_ESM.pdf [file 13012_2015_282_MOESM1_ESM.pdf]
